# Supplementary material
Source: publisher figshare collection journal article supplement (https://asha.figshare.com/ndownloader/files/31509341)

**Supplemental Material S2.** Directed acyclic graphs of the variables, dependencies, and prior assumptions for the cross-sectional and longitudinal Bayesian IRT models.

A) Directed acyclic graph depicting variables and dependencies in the cross-sectional item response theory model of naming accuracy (IRT-P(S)), used to estimate the unidimensional item difficulty values  $\delta$  from an independent data set. B) Directed acyclic graph depicting variables and dependencies in the longitudinal model of IRT-P(S). The ability of a participant  $\beta$  combines with the previously observed difficulty of an item  $\delta$  to determine the probability of a correct response  $P(S)$  via a logistic equation. The parameters of the prior distribution on  $\beta$  are intended to be minimally informative about the probability of success on a test item of average difficulty. The binary outcome  $S$  of each naming trial is modeled as a Bernoulli trial with probability of success  $P(S)$ . The change in a participant’s ability during an interval of time between tests  $\Delta$  is modeled as a standard normal Gaussian, with a prior belief centered on zero change. The binary outcome  $S$  of each naming trial is modeled as a Bernoulli trial with probability of success  $P(S)$ . The change in a participant’s ability during an interval of time between tests  $\Delta$  is modeled as a standard normal Gaussian, with a prior belief centered on zero change. circle/square = continuous/discrete variable, shaded/unshaded = observed/unobserved variable, single/double border = stochastic/deterministic variable, arrow = dependency, rounded square = set. The  $\sim$  symbol means “is distributed as”.

A)

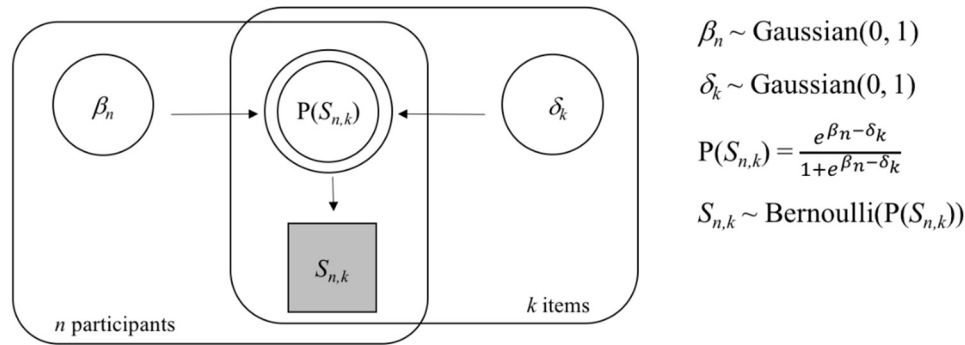

B)

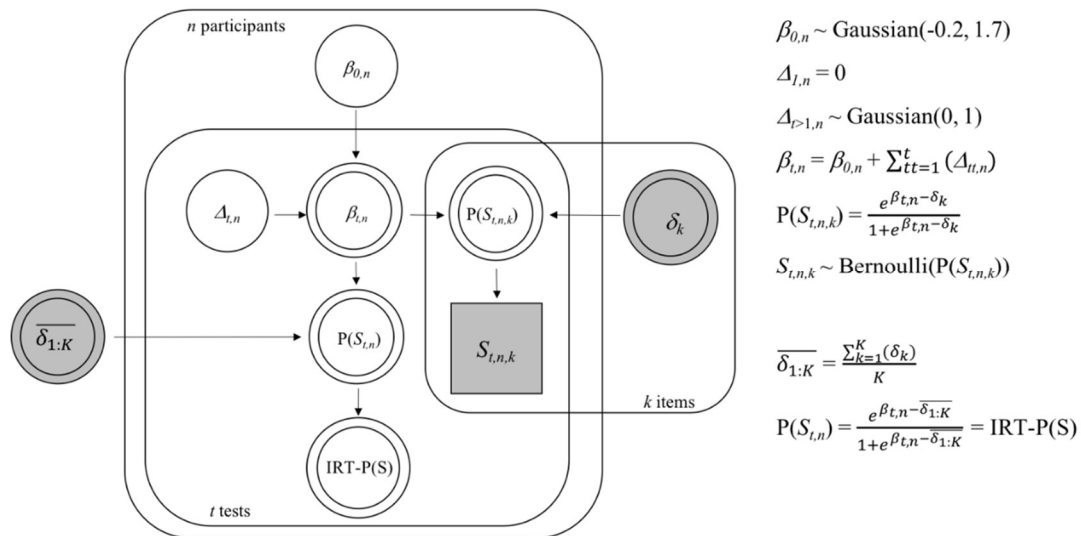

Supplement: Supplementary file 1 [file 31509341]
